# Supplementary material for: Development of a green scalable route toward the synthesis of bio-based 2-pyrones
Source: Royal Society of Chemistry journal article supplement (doi:10.1039/d3re00667k), 2024-01-01
Supplement: d3re00667k1.pdf [file d3re00667k1.pdf]

# Development of a green scalable route toward the synthesis of bio-based 2-pyrones

Grazia Isa C. Righetti,\*<sup>a</sup> Cristian Gambarotti\*<sup>a</sup> and Hans-René Bjørsvik<sup>b</sup>

<sup>a</sup> Department of Chemistry, Materials and Chemical Engineering “Giulio Natta”, Politecnico di Milano, piazza Leonardo da Vinci 32, I-20133 Milano, Italy.

<sup>b</sup> Department of Chemistry, University of Bergen, Allegaten 41, N-5007 Bergen, Norway

## Supplementary information

The <sup>1</sup>H-NMR was recorded on a Bruker AV 500 MHz instrument, equipped with a 5 mm multinuclear probe, and 32 scans were acquired with an acquiring time of 3 seconds for each spectrum. The <sup>1</sup>H-NMR analysis was performed in the presence of an external standard: 1,4-dinitro benzene for DMSO-d<sub>6</sub> and trioxane for D<sub>2</sub>O

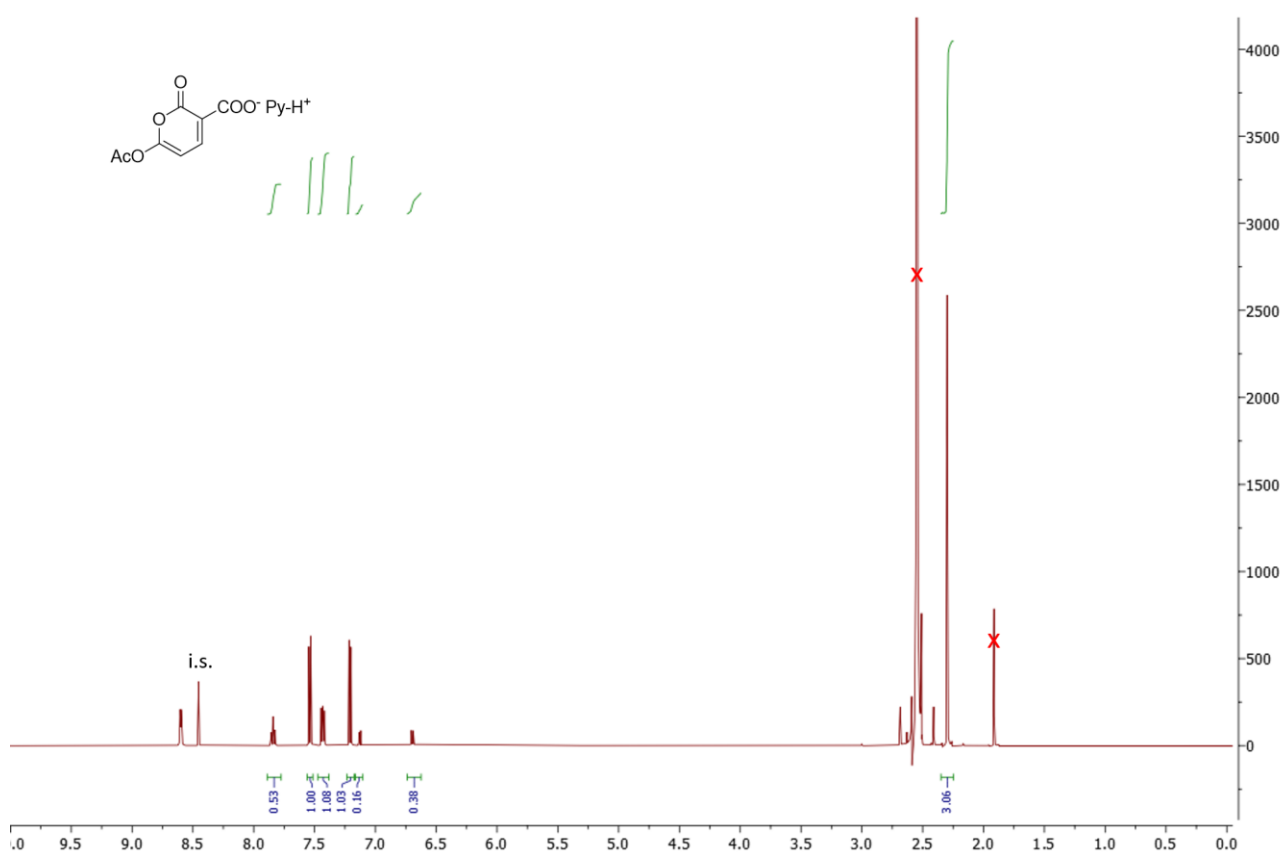

Figure S1. <sup>1</sup>H NMR spectrum (DMSO-d<sub>6</sub>) of pyrone **3** as pyridinium salt
